# Supplementary material for: Transcriptional Homeostasis of a Mangrove Species, Ceriops tagal, in Saline Environments, as Revealed by Microarray Analysis
Source: PubMed Central journal article supplement (PMC3344879; doi:10.1371/journal.pone.0036499), 2012-05-04
Supplement: pone.0036499.s002.pdf [file pone.0036499.s002.pdf]

**Table S1 Primer pairs used in quantitative PCR**

| Gene ID  | Forward Primer           | Reverse sequence       |
|----------|--------------------------|------------------------|
| 18S rRNA | GAACGGCCATGCACCACCAC     | GGAAGGGCACCACCAGGAGT   |
| CiR_N125 | TCTCGTTTTCTTCACTT        | AGGTCGTCCCTGCTTATC     |
| CiR_6    | TGTTACCCAGTTCTACAACGAGCA | TTTTCCCAGGCATCACAGTCAG |
| CiR_N039 | CCTTTTCCTAGGAGTTACTATCGT | AAAGGCAGCGGCAGAGAA     |
| CiR_N153 | ACATTTACTTGCCTCGGGATT    | AACCGTTACAGGAACTTGAGGA |
| CiR_15   | AGCCTGCCTCTGTGCTGTTA     | GCTGCATACTCAATGTCTTCCC |
| CiR_13   | TTAAGCCTCCCAAGGTAGCC     | AAAGGGTCATCAGGGTTCG    |
